# Supplementary material for: Applicability of electro-osmotic flow for the analysis of the surface zeta potential
Source: Royal Society of Chemistry journal article supplement (doi:10.1039/c9ra10414c), 2020-01-01
Supplement: c9ra10414c1.pdf [file c9ra10414c1.pdf]

Supporting Information for:

**Applicability of electro-osmotic flow for the analysis of the surface zeta potential**

Olivija Plohl<sup>1,\*</sup>, Lidija Fras Zemljič<sup>1</sup>, Sanja Potrč<sup>1,2</sup>, Thomas Luxbacher<sup>3</sup>

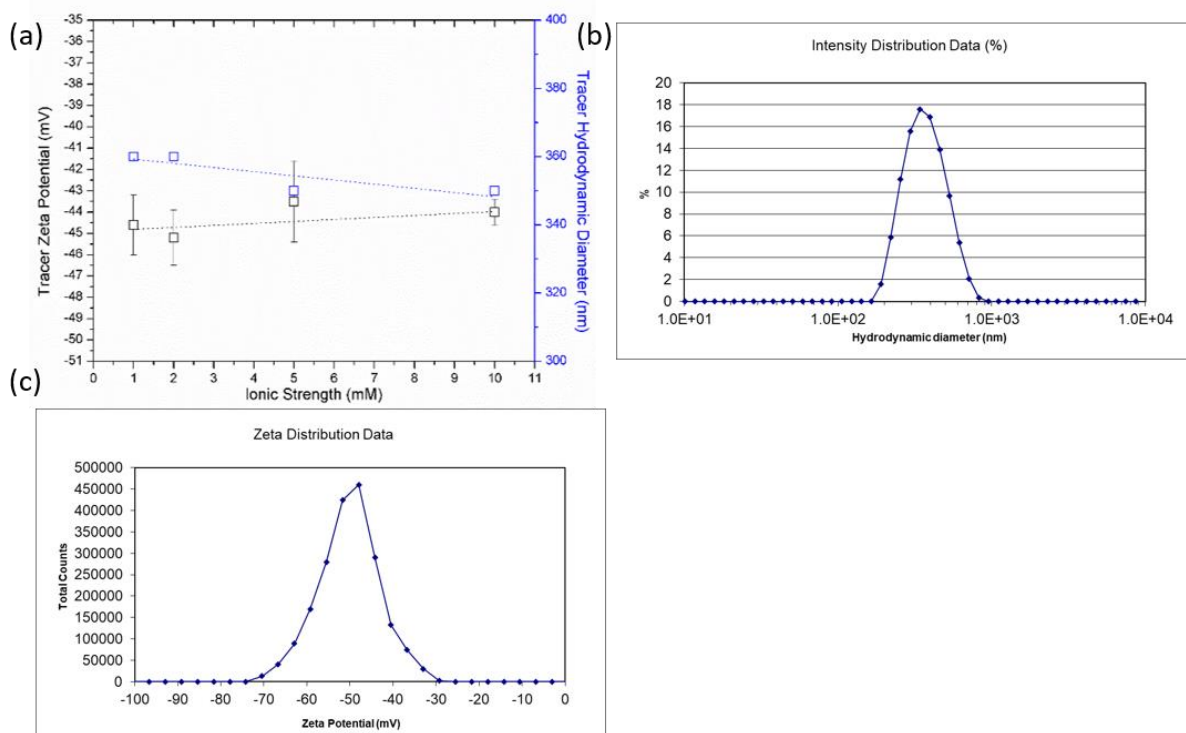

Figure SI1: (a) ZP and hydrodynamic diameter of Latex tracer particles as a function of ionic strength. (b) Example of latex tracer particles size distribution and (c) zeta potential graph in 2 mM KCl solution and pH 9.

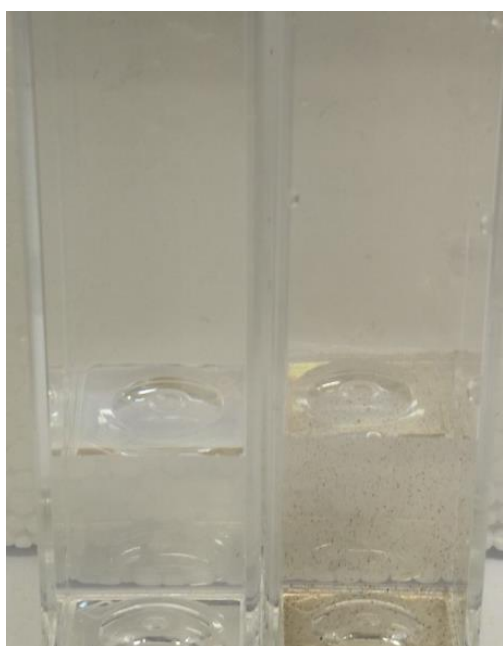

Figure SI2: Image of Latex tracer particle dispersion before and after measurement of the PEEK sample holder at 5 mM KCl in pH 8-9.

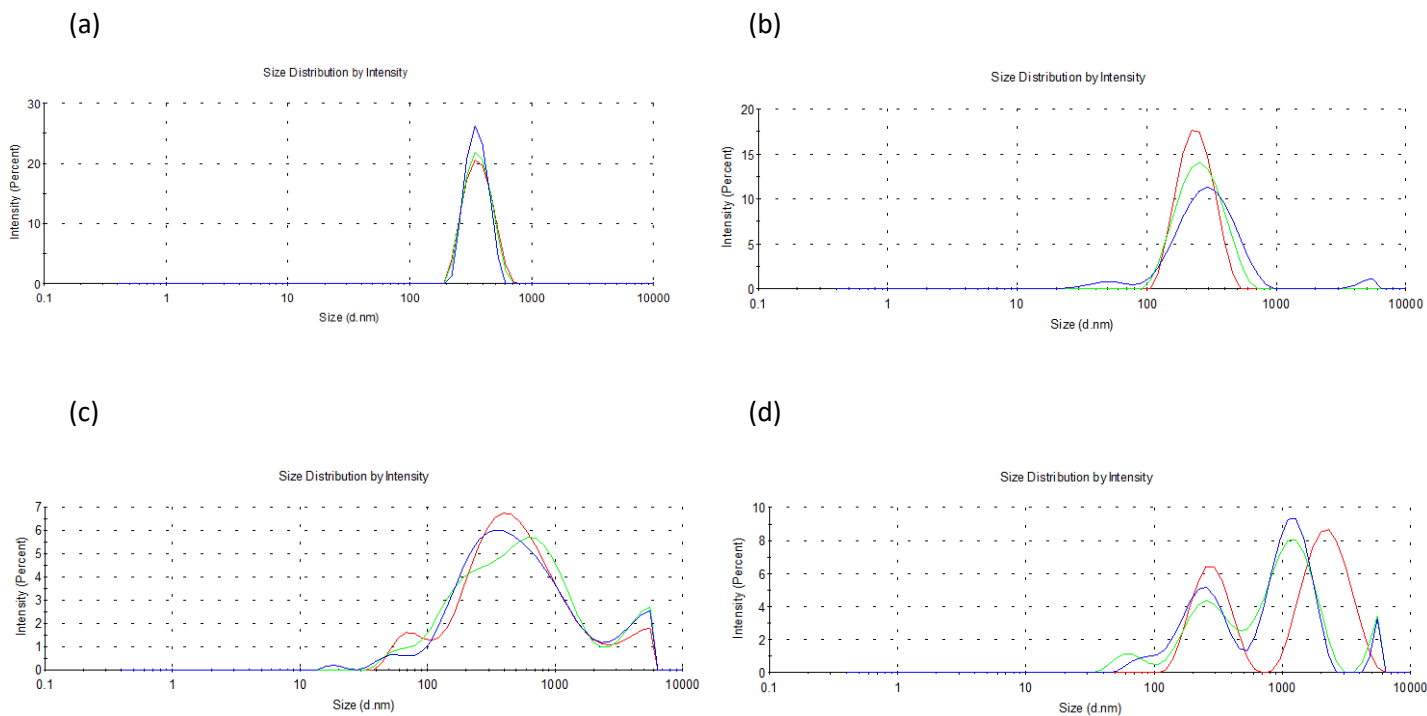

Figure SI3: Tracer latex particles in the 5 mM KCl before measurement (a); the same tracer particles after the measurement at 5 V (b), 10 V (c) and 20 V (d).

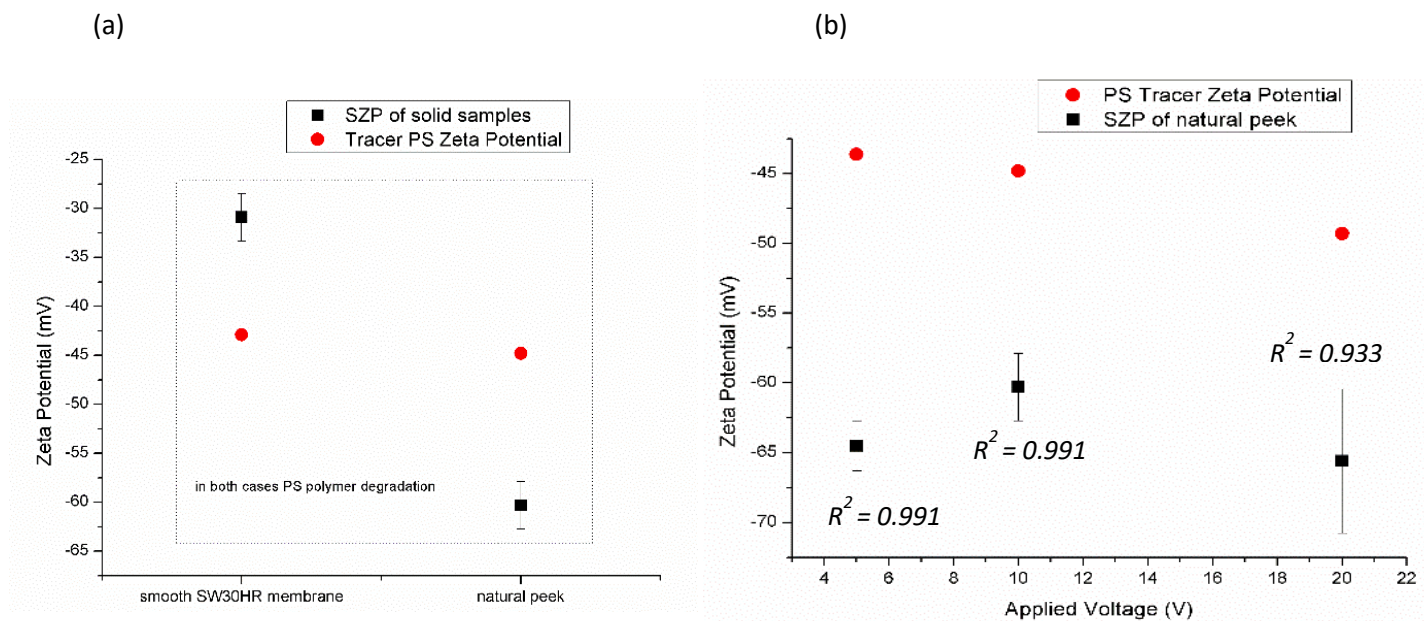

Figure SI4: Effect of sample onto Latex tracer particle stability in 5 mM KCl (a) and effect of the manually applied voltage onto extend of the polymer tracer particles degradation (b).

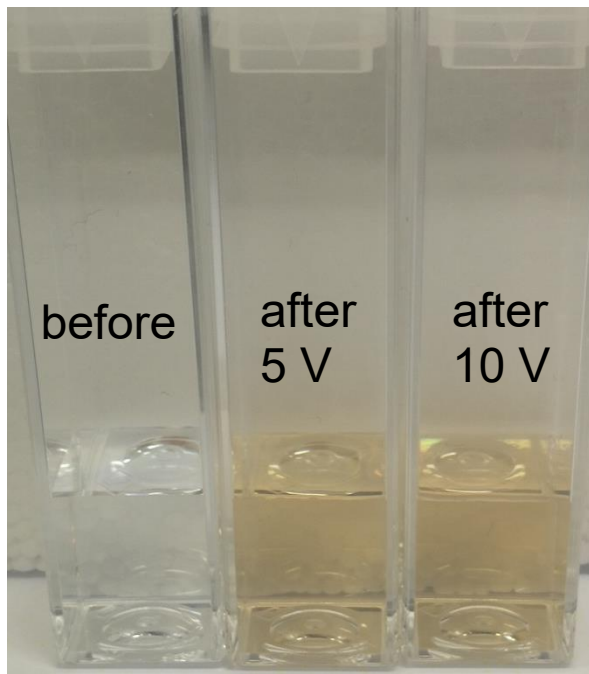

Figure SI5: Latex tracer particle dispersion before and after measurement manually applied voltage 5 V and 10 V in 5 mM KCl.
